# Supplementary material for: Enhanced bioreduction-responsive diselenide-based dimeric prodrug nanoparticles for triple negative breast cancer therapy
Source: PubMed Central journal article supplement — Theranostics. 2018 Sep 9;8(18):4884–97. doi: 10.7150/thno.27581 (PMC6217054; doi:10.7150/thno.27581), 2018-09-09
Supplement: thnov08p4884s1.pdf [file thnov08p4884s1.pdf]

1 **Enhanced Bioreduction-Responsive Diselenide-**  
2 **Based Dimeric Prodrug Nanoparticles for Triple**  
3 **Negative Breast Cancer Therapy**

4 *Xi He<sup>a</sup>, Jinxiao Zhang<sup>c</sup>, Chao Li<sup>a</sup>, Yu Zhang<sup>a</sup>, Yifei Lu<sup>a</sup>, Yujie Zhang<sup>a</sup>, Lisha Liu<sup>a</sup>, Chunhui*  
5 *Ruan<sup>a</sup>, Qinjun Chen<sup>a</sup>, Xinli Chen<sup>a</sup>, Qin Guo<sup>a</sup>, Tao Sun<sup>a</sup>, Jianjun Cheng<sup>\*b</sup>, Chen Jiang<sup>\*a</sup>*

6 <sup>a</sup> Key Laboratory of Smart Drug Delivery, Ministry of Education, State Key Laboratory of Medical  
7 Neurobiology, School of Pharmacy, Fudan University, Shanghai 200032, China;

8 <sup>b</sup> Department of Materials Science and Engineering, University of Illinois at Urbana-Champaign,  
9 1304 W. Green Street, Urbana, Illinois 61801, United States;

10 <sup>c</sup> School of Chemistry and Materials Science, University of Science and Technology of China,  
11 Hefei, Anhui 230026, China

12 \* Corresponding authors.

13 \* [jiangchen@shmu.edu.cn](mailto:jiangchen@shmu.edu.cn)

14 \* [jianjunc@illinois.edu](mailto:jianjunc@illinois.edu)

15

16

17

18

19

20

## 1 **Synthesis of PTXD-Se:**

2 The synthesis routes of PTXD-Se were generally described in Scheme S1. Characterization of  
3 related compounds were shown in Figure S1-12.

### 4 ***Synthesis of compound 2***

5 PTX (427 mg, 0.5 mmol), DMAP (6 mg, 0.05 mmol) and Et<sub>3</sub>N (118  $\mu$ l, 0.5 mmol) were  
6 dissolved in anhydrous DCM (5 ml). Then 5 ml anhydrous DCM solution of 4-nitrophenyl  
7 chloroformate (PNP) was added dropwise at room temperature. After 4 h, the reaction was finished  
8 as monitored by TLC. The mixture was subject to chromatography (Hexane: EtOAc 1:1). The  
9 product was obtained as white solid (371.1 mg, yield 73%). <sup>1</sup>H NMR spectrum and peak  
10 assignments was shown in Figure S1.

### 11 ***Synthesis of compound 3***

12 Et<sub>3</sub>N (51  $\mu$ l, 0.36 mmol) and compound 20 (136 mg, 0.72 mmol) were dissolved in anhydrous  
13 DCM (5 ml). Then 5 ml anhydrous DCM solution of 2 (371.1 mg, 0.36 mmol) was added dropwise.  
14 The reaction was stirred overnight, then finished as monitored by TLC. The mixture was  
15 concentrated under vacuum and purified by column chromatography (Hexane: EtOAc 1:3) to give  
16 a white solid (386 mg, yield 86%). <sup>1</sup>H NMR spectrum and peak assignments was shown in Figure  
17 S1.

### 18 ***Synthesis of compound 4***

19 Compound 3 (544.8 mg, 0.5 mmol) was dissolved in 2 ml of DCM/TFA (1:1 v/v) in an ice bath.  
20 After 5 min, the reaction was finished as monitored by TLC. The mixture was diluted with DCM  
21 (100 ml) and washed with 5% NaHCO<sub>3</sub> solution (5  $\times$  20 ml), and then with DI water (3  $\times$  20 ml).  
22 The organic phase was dried with anhydrous Na<sub>2</sub>SO<sub>4</sub>. After the solvent was removed under  
23 vacuum, compound 4 was acquired as white solid (476.8 mg, yield 97%).

### 1 ***Synthesis of compound 6***

2 Compound 6 was synthesized as reported previously. Briefly, selenium (4.4 g, 0.056 mol) was  
3 added in small portions to a heated (65 °C) and well stirred mixture of KOH (85%, 3.96 g, 0.06  
4 mol), water (20 ml) and 55% hydrazine monohydrate (1.56 ml, 0.028 mol). The resulting brownish  
5 solution was heated at 90 °C for 2 h, then cooled to 50 °C. 2-chloroethanol (3.8 ml, 0.056 mol) was  
6 added dropwise and heating continued for another 3 h. Then greenish-yellow solution was allowed  
7 to cool to room temperature and stirred overnight until the TLC showed the reaction had proceeded  
8 to completion. The reaction mixture was filtered through Celite to remove unreacted Se. The  
9 filtrate was extracted with DCM (5 × 40 ml). The organic layer was dried over anhydrous Na<sub>2</sub>SO<sub>4</sub>,  
10 filtered and concentrated. The crude product was purified by chromatography (Hexane: EtOAc  
11 1:1) and got bright orange oil (2.2 g, 32%). <sup>1</sup>H NMR (400 MHz, CDCl<sub>3</sub>), δ 3.93 (t, 4H, J = 3.9 Hz),  
12 3.11 (t, 4H, J = 3.1 Hz). MS-EI (m/z): [M]<sup>+</sup> calcd for C<sub>4</sub>H<sub>10</sub>O<sub>2</sub>Se<sub>2</sub>, 249.9; observed, 249.9. <sup>1</sup>H  
13 NMR spectrum and peak assignments was shown in Figure S2.

### 14 ***Synthesis of compound 8***

15 An aqueous solution (150 ml) of 3-chloro-1-propanol (9.45 g, 100 mmol) was refluxed with  
16 sodium azide (9.75 g, 150 mmol, 1.5 equiv.) for 22 h. The product was extracted with 100 mL  
17 methylene chloride three times, dried over sodium sulfate and concentrated as colorless oil (9.31  
18 g, 92 % yield). <sup>1</sup>H NMR (400 MHz, CDCl<sub>3</sub>), δ 3.76 (t, 2H, J = 5.7 Hz), 3.46 (t, 2H, J = 6.5 Hz),  
19 1.84 (m, 2H). MS-EI (m/z): [M]<sup>+</sup> calcd for C<sub>3</sub>H<sub>7</sub>N<sub>3</sub>O, 101.1; observed, 101.1. <sup>1</sup>H NMR spectrum  
20 and peak assignments was shown in Figure S3.

### 21 ***Synthesis of compound 9***

22 Triphosgene (388 mg, 1.3 mmol) was added into 5 ml anhydrous DCM solution of compound 8  
23 (330mg, 3.25mmol) in 0 °C. After stirring at room temperature overnight, solvent was removed

1 under vacuum. The as prepared chloroformate was redissolved in 2 ml anhydrous DCM and added  
2 into an anhydrous DCM solution of compound 6 (2.43 g, 9.8 mmol) and DMAP (1.197 g, 9.8  
3 mmol). After stirring for another 12 h, the mixture was concentrated under vacuum, extracted with  
4 50 ml EtOAc, and washed with water (3 × 40 ml). The organic layer was dried over anhydrous  
5 Na<sub>2</sub>SO<sub>4</sub>, filtered and got a yellow oil. The crude product was purified with chromatography  
6 (Hexane: EtOAc 1:1) and acquired a yellow oil (720 mg, 59%). <sup>1</sup>H NMR (400 MHz, CDCl<sub>3</sub>), δ  
7 4.41 (t, 2H, J = 4.4 Hz), 4.25 (t, 2H, J = 4.3 Hz), 3.89 (t, 2H, J = 3.9 Hz), 3.43 (t, 2H, J = 3.4 Hz),  
8 2.96 (t, 2H, J = 3.0 Hz), 2.90 (t, 2H, J = 2.9 Hz), 1.95 (m, 2H, J = 2.0 Hz). MS-EI (m/z): [M]<sup>+</sup>  
9 calcd for C<sub>8</sub>H<sub>15</sub>N<sub>3</sub>O<sub>4</sub>Se<sub>2</sub>, 376.9; observed, 376.9. <sup>1</sup>H NMR spectrum and peak assignments was  
10 shown in Figure S4.

### 11 ***Synthesis of compound 10***

12 Compound 9 (188 mg, 0.5 mmol), DMAP (6 mg, 0.05 mmol) and Et<sub>3</sub>N (118 μl, 0.5 mmol) were  
13 dissolved in anhydrous DCM (5 ml). Then 5 ml anhydrous DCM solution of 4-nitrophenyl  
14 chloroformate (PNP) was added dropwise at room temperature. After 6 h, the mixture was  
15 concentrated under vacuum and subject to chromatography (Hexane: DCM 1:4). The product was  
16 obtained as yellow solid (230 mg, yield 85%). <sup>1</sup>H NMR (400 MHz, CDCl<sub>3</sub>), δ 8.25 (d, 2H, J = 8.2  
17 Hz), 7.37 (d, 2H, J = 47.4 Hz), 4.52 (t, 2H, J = 4.5 Hz), 4.39 (t, 2H, J = 4.4 Hz), 4.21 (t, 2H, J =  
18 4.2 Hz), 3.40 (t, 2H, J = 3.4 Hz), 3.03 (t, 2H, J = 3.0 Hz), 2.97 (t, 2H, J = 3.0 Hz), 1.91 (m, 2H, J  
19 = 1.9 Hz). MS-EI (m/z): [M]<sup>+</sup> calcd for C<sub>15</sub>H<sub>18</sub>N<sub>4</sub>O<sub>8</sub>Se<sub>2</sub>, 540.2; observed, 540.2. <sup>1</sup>H NMR  
20 spectrum and peak assignments was shown in Figure S5.

### 21 ***Synthesis of compound 12***

22 Compound 11 (2 g, 11.9 mmol) and imidazole (2.02 g, 29.7 mmol) were dissolved in 10 ml  
23 anhydrous DMF. Then 5 ml anhydrous DMF of TBSCl (4.5 g, 29.7 mmol) was added slowly in

1 an ice bath. The reaction was allowed to reach room temperature and stirred overnight. The mixture  
2 was concentrated under vacuum and purified by chromatography (Hexane: EtOAc 40:1). The  
3 product was obtained as transparent oil (4.4 g, yield 94%). <sup>1</sup>H NMR (400 MHz, CDCl<sub>3</sub>), δ 8.12 (s,  
4 1H), 6.75 (s, 2H), 4.79 (s, 4H), 2.25(s, 3H), 0.92 (s, 18H), 0.09 (s, 12H). MS-EI (m/z): [M]<sup>+</sup> calcd  
5 for C<sub>21</sub>H<sub>40</sub>O<sub>3</sub>Si<sub>2</sub>, 396.7; observed, 396.7. <sup>1</sup>H NMR spectrum and peak assignments was shown in  
6 Figure S6.

### 7 ***Synthesis of compound 13***

8 Compound 12 (1.53 g, 3.9 mmol), Et<sub>3</sub>N (1.92 ml, 11.7 mmol) were dissolved in 10 ml anhydrous  
9 THF. Then PNP (1.01 g, 5.07 mmol) was dissolved in 5 ml anhydrous THF and added dropwise  
10 at 0 °C. The reaction was allowed to reach room temperature and stirred for another 2 h. The white  
11 suspension was filtered. And the filtrate was concentrated and purified by chromatography  
12 (Hexane: EtOAc 8:1). The product was obtained as white solid (1.95 g, yield 90%). The product  
13 was obtained as transparent oil (4.4 g, yield 94%). <sup>1</sup>H NMR (400 MHz, CDCl<sub>3</sub>), δ 8.31 (d, 2H, J =  
14 8.3), 7.48 (s, 2H, J = 7.5), 7.22 (s, 2H), 4.72(s, 4H), 2.38 (s, 3H), 0.92 (s, 18H), 0.09 (s, 12H). MS-  
15 EI (m/z): [M]<sup>+</sup> calcd for C<sub>28</sub>H<sub>43</sub>NO<sub>7</sub>Si<sub>2</sub>, 561.2; observed, 561.2. <sup>1</sup>H NMR spectrum and peak  
16 assignments was shown in Figure S7.

### 17 ***Synthesis of compound 14***

18 Compound 13 (662 mg, 1.2 mmol) was dissolved in anhydrous DCM. Then compound 20 (264.1  
19 mg, 1.4 mmol) was added quickly. The reaction was stirred at room temperature for 4 h and  
20 monitored by TLC (Hexane: EtOAc 4:1). The solvent was removed under vacuum and product  
21 was purified by chromatography (Hexane: EtOAc 8:1). The product was obtained as white solid  
22 (531.3 mg, 73 %). <sup>1</sup>H NMR (400 MHz, CDCl<sub>3</sub>), δ 7.19 (s, 2H), 4.51(s, 4H), 3.16 (s, 2H), 3.03 (s,  
23 2H), 2.89 (m, 4H), 2.33 (m, 3H), 1.49 (s, 9H), 0.92 (s, 18H), 0.09 (s, 12H). MS-EI (m/z): [M]<sup>+</sup>

1 calcd for  $C_{31}H_{58}N_2O_6Si_2$ , 610.4; observed, 610.4.  $^1H$  NMR spectrum and peak assignments was  
2 shown in Figure S8.

### 3 ***Synthesis of compound 15***

4 Compound 14 (531.3 mg, 0.9 mmol) was stirred with 100 mg amberlyst-15 in a mixture of  
5 DCM/MeOH (2:1) overnight. After the reaction completed, the mixture was filtered to removed  
6 amberlyst-15. The suspension was subject to flash column (Hexane: EtOAc 4:1 to EtOAc) giving  
7 a white solid (299 mg, 90%).  $^1H$  NMR (400 MHz,  $CDCl_3$ ),  $\delta$  7.19 (s, 2H), 4.51(s, 4H), 3.47 (m,  
8 4H), 3.16 (s, 2H), 3.03 (s, 2H), 2.33 (m, 3H), 1.42 (s, 9H). MS-EI (m/z):  $[M]^+$  calcd for  
9  $C_{19}H_{30}N_2O_6$ , 382.5; observed, 382.5.  $^1H$  NMR spectrum and peak assignments was shown in  
10 Figure S9.

### 11 ***Synthesis of compound 16***

12 PNP (158 mg, 0.78 mmol) was dissolved in 2 ml anhydrous DCM. Then a mixture of compound  
13 15 (100 mg, 0.26 mmol),  $Et_3N$  (109  $\mu$ l, 0.78 mmol) and a catalytic amount of DMAP was added.  
14 The reaction was stirred at room temperature for 4 h and monitored by TLC (hexane: EtOAc 1:1).  
15 After completion, the solvent was removed under vacuum and the product was purified by  
16 chromatography (hexane: EtOAc 2:1) giving compound 16 as a white powder (59.3 mg, yield  
17 32%).  $^1H$  NMR (400 MHz,  $CDCl_3$ ),  $\delta$  8.25(d, 4H, J = 8.2), 7.79(d, 4H, J = 8.2), 7.25 (s, 2H), 5.25(s,  
18 4H), 3.48(m, 6H), 3.28 (s, 4H), 1.25 (s, 9H). MS-EI (m/z):  $[M]^+$  calcd for  $C_{33}H_{36}N_4O_{14}$ , 712.7;  
19 observed, 712.7.  $^1H$  NMR spectrum and peak assignments was shown in Figure S10.

### 20 ***Synthesis of compound 17***

21 Compound 4 (292.8 mg, 0.3 mmol),  $Et_3N$  (42  $\mu$ l, 0.3 mmol) and a catalytic amount of DMAP  
22 were dissolved in 5 ml anhydrous DCM. Compound 16 (54 mg, 0.075 mmol) was dissolved in 2  
23 ml anhydrous DCM and added dropwise. The reaction was stirred for 4 h and monitored by TLC

1 (DCM: MeOH 10:1). After completion, the mixture was concentrated and purified by  
2 chromatography (DCM: MeOH 20:1). The product was obtained as white powder (64 mg, 30%).

### 3 *Synthesis of compound 19*

4 Compound 17 (64 mg, 0.027 mmol) was dissolved in 2 ml of DCM/TFA (1:1 v/v) in an ice bath.  
5 After 5 min, the reaction was finished as monitored by TLC. The mixture was then diluted with  
6 DCM (100 ml) and washed with 5% NaHCO<sub>3</sub> solution (5 × 20 ml), and then with water (3 × 20  
7 ml). The organic phase was dried with anhydrous Na<sub>2</sub>SO<sub>4</sub>. After the solvent was removed under  
8 vacuum, intermediate product compound 18 was acquired as white solid (64 mg, 36%).

9 Compound 18 (42 mg, 0.018 mmol), Et<sub>3</sub>N (5 μl, 0.036 mmol) and a catalytic amount of DMAP  
10 were dissolved in 5 ml anhydrous DCM. Compound 10 (20 mg, 0.036 mmol) was added quickly  
11 and the solution was stirred for 4h. The reaction was monitored by TLC (DCM: MeOH 20:1).  
12 After completion, the product was purified by chromatography (DCM: MeOH 20:1), giving a  
13 white powder (25.6 mg, 54%). Q-TOF results implied the successful synthesis of compound 19  
14 (Figure S11). Q-TOF (m/z): [M]<sup>+</sup> calcd for C<sub>129</sub>H<sub>153</sub>N<sub>11</sub>O<sub>41</sub>Se<sub>2</sub>, 2671.56; observed, 2671.8556.

### 15 *Synthesis of compound 20*

16 (Boc)<sub>2</sub>O (2.552 g, 11.7 mmol) was dissolved in 10 ml anhydrous THF and slowly added into 10  
17 ml anhydrous THF of N,N'-dimethylethylenediamine (0.132 g, 1.5 mmol) in 2 h. The mixture was  
18 stirred for another 22 h and the solvent was removed under vacuum. Water (20 ml) was added to  
19 the residue and the insoluble solid was filtered off. The filtrate was extracted by DCM (3 × 20 ml)  
20 and washed by water (3 × 20 ml) and brine (20 ml). The organic phase was dried over Na<sub>2</sub>SO<sub>4</sub>  
21 and DCM was removed to obtain transparent oil (169 mg, 60%). <sup>1</sup>H NMR (400 MHz, CDCl<sub>3</sub>), δ  
22 3.32(t, 2H, J = 2.7), 2.87(s, 3H), 2.72 (t, 2H, J = 2.7), 2.45(s, 3H), 1.45(s, 9H). MS-EI (m/z): [M]<sup>+</sup>

1 calcd for C<sub>9</sub>H<sub>20</sub>N<sub>2</sub>O<sub>2</sub>, 188.2; observed, 188.2. <sup>1</sup>H NMR spectrum and peak assignments was shown  
2 in Figure S12.

### 3 **Synthesis of outer shell polymer mPEG<sub>5K</sub>-pPhe(n) and uPA-PEG-pPhe(15)**

4 L-phenylalanine N-carboxyanhydride (Phe-NCA) was synthesized as previously reported[6b].  
5 mPEG<sub>5K</sub>-pPhe(n) of various polymerization degrees were synthesized *via* ring-opening  
6 polymerization (ROP) reaction. In brief, mPEG<sub>5K</sub>-NH<sub>2</sub> (50 mg, 0.01 mmol) and different  
7 equivalent of Phe-NCA (5 eq., 10 eq., 15 eq., 20 eq.) were dissolved in 5 ml anhydrous DMSO  
8 and stirred at 50 °C under nitrogen protection for 48 h. The polymers were purified by repeated  
9 precipitation from DMSO into diethylether and vacuum-dried to obtain white solid. mPEG<sub>5K</sub>-  
10 pPhe(15) and uPA-PEG-pPhe(15) were characterized *via* NMR and IR (Figure S13-14).

11 uPA-PEG-pPhe(15) was synthesized in two steps. First, N<sub>3</sub>-PEG<sub>5K</sub>-pPhe(15) was synthesized  
12 in the same above procedure with N<sub>3</sub>-PEG<sub>5K</sub>-NH<sub>2</sub> as initiator. Then uPA peptide was coupled to  
13 the terminus of N<sub>3</sub>-PEG<sub>5K</sub>-pPhe(15) *via* click reaction. Briefly, N<sub>3</sub>-PEG<sub>5K</sub>-pPhe and uPA peptide  
14 (2 eq.) were dissolved in DMF under nitrogen protection. A freshly prepared solution of CuI (0.5  
15 eq.), sodium ascorbate (20 eq.) and DIPEA (1 eq.) were added into the mixture and stirred at room  
16 temperature for 24 h. uPA-PEG-pPhe(15) was purified by dialysis using a membrane (Mw: 5000)  
17 against 10 mM EDTA for 24 h, DI water for 24 h, and followed by lyophilization. The  
18 disappearance of N<sub>3</sub> group in IR spectrum implied the successful synthesis of uPA-PEG-pPhe(15)  
19 (Figure S14).

20



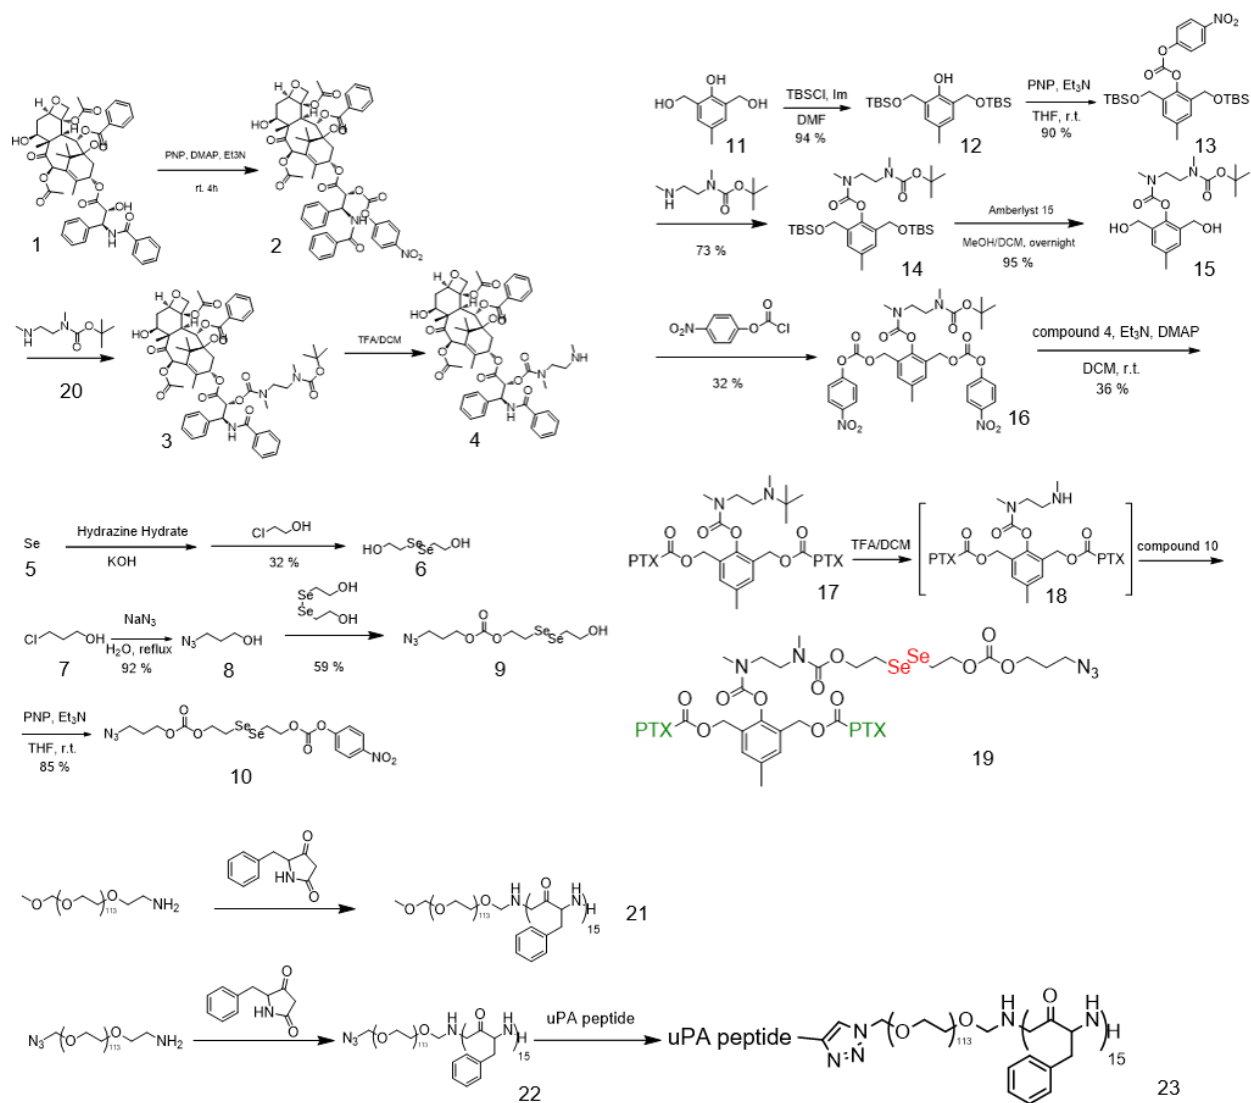

1  
 2 **Scheme S1.** Synthesis route of PTXD-Se, mPEG5k-pPhe(15) and uPA-PEG5k-pPhe(15)  
 3

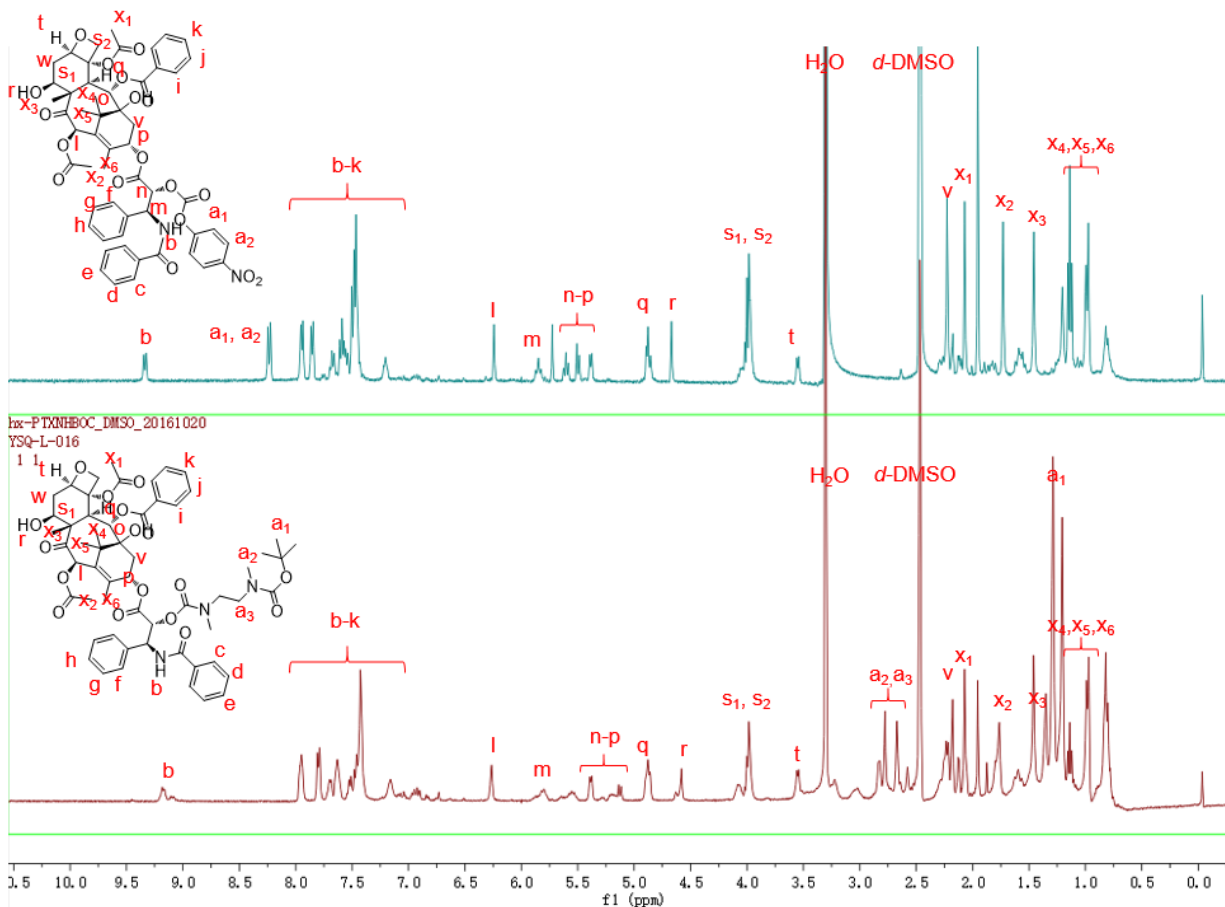

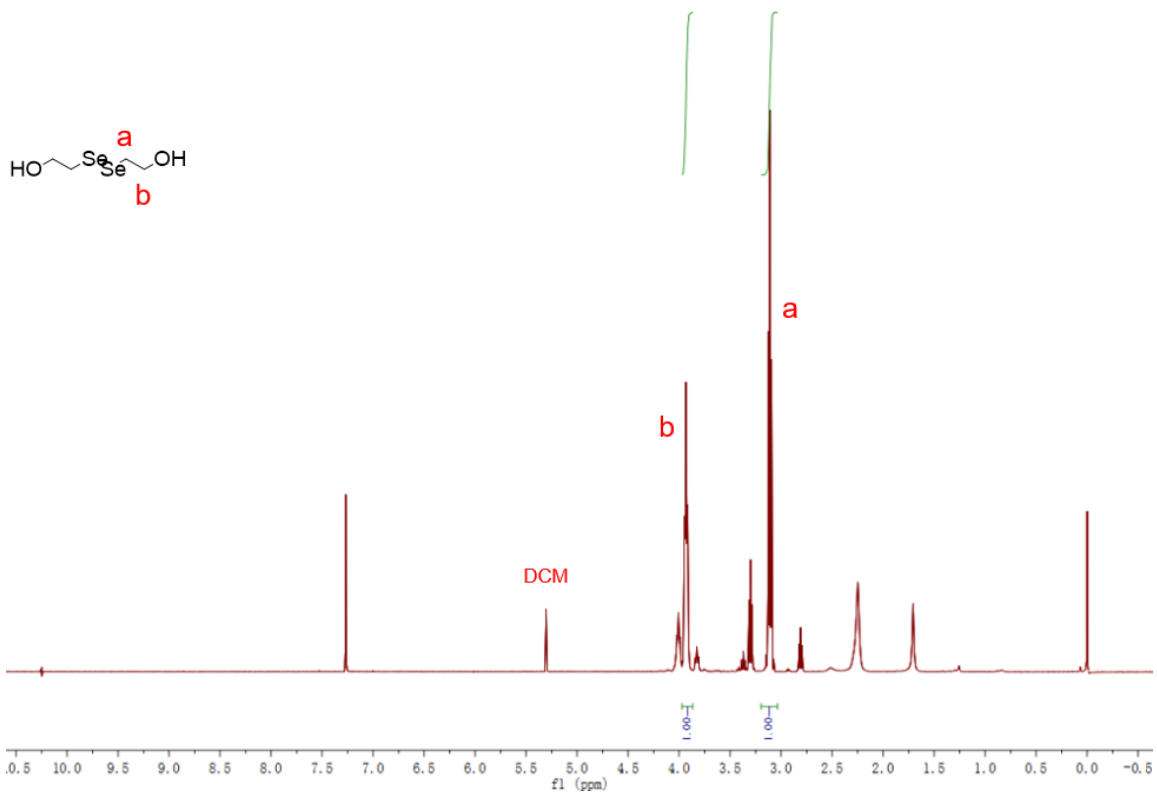

1  
2  
3

Figure S2. <sup>1</sup>H NMR of compound 6

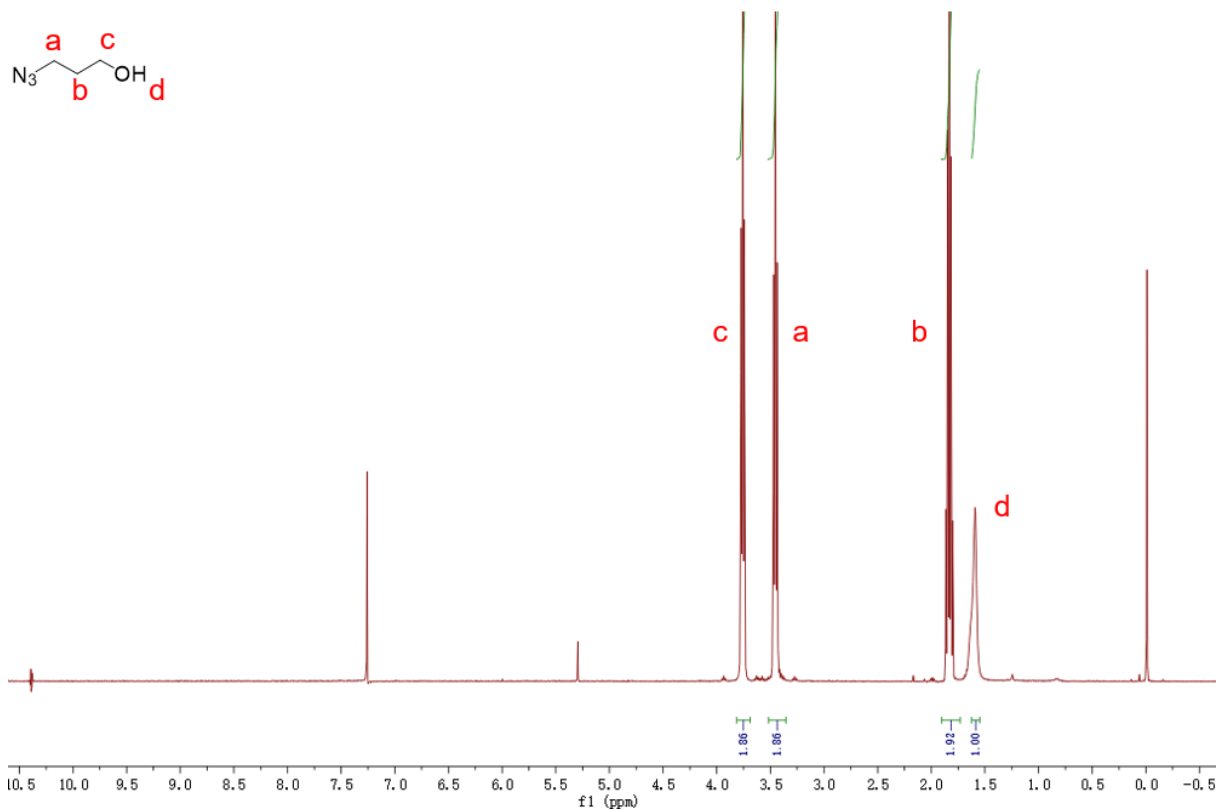

Figure S3. <sup>1</sup>H NMR of compound 8

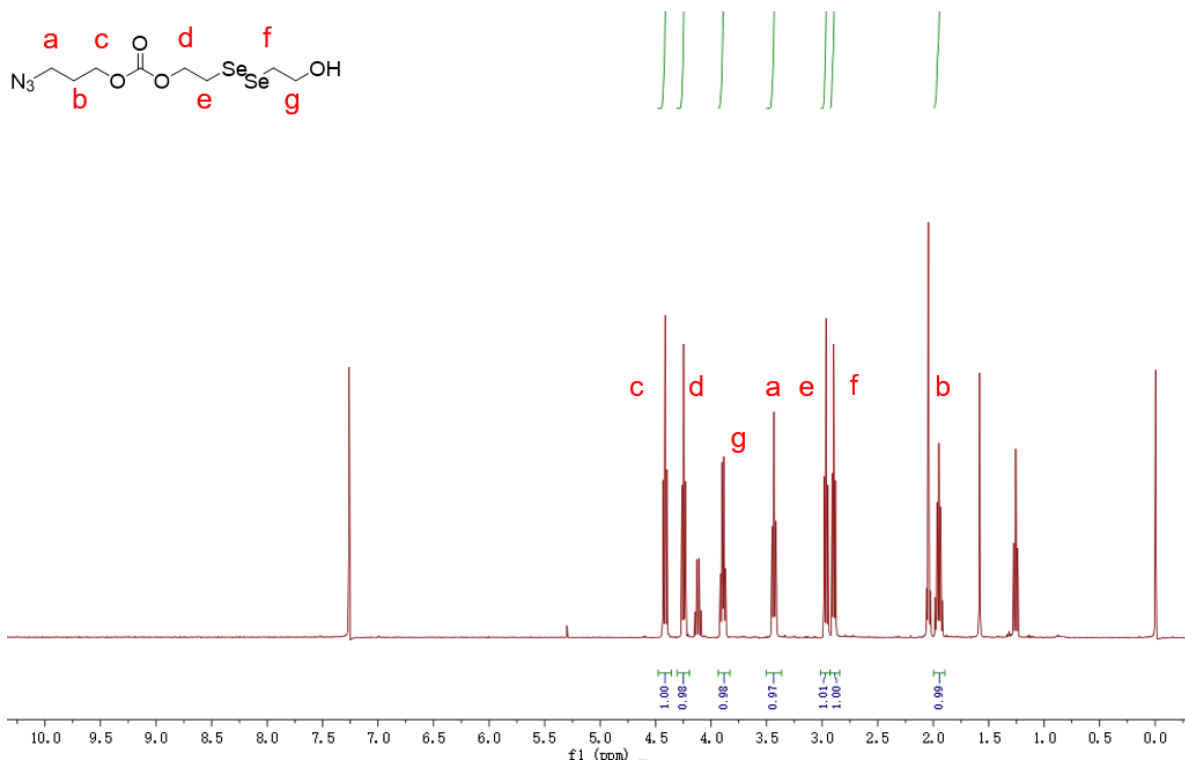

Figure S4. <sup>1</sup>H NMR of compound 9

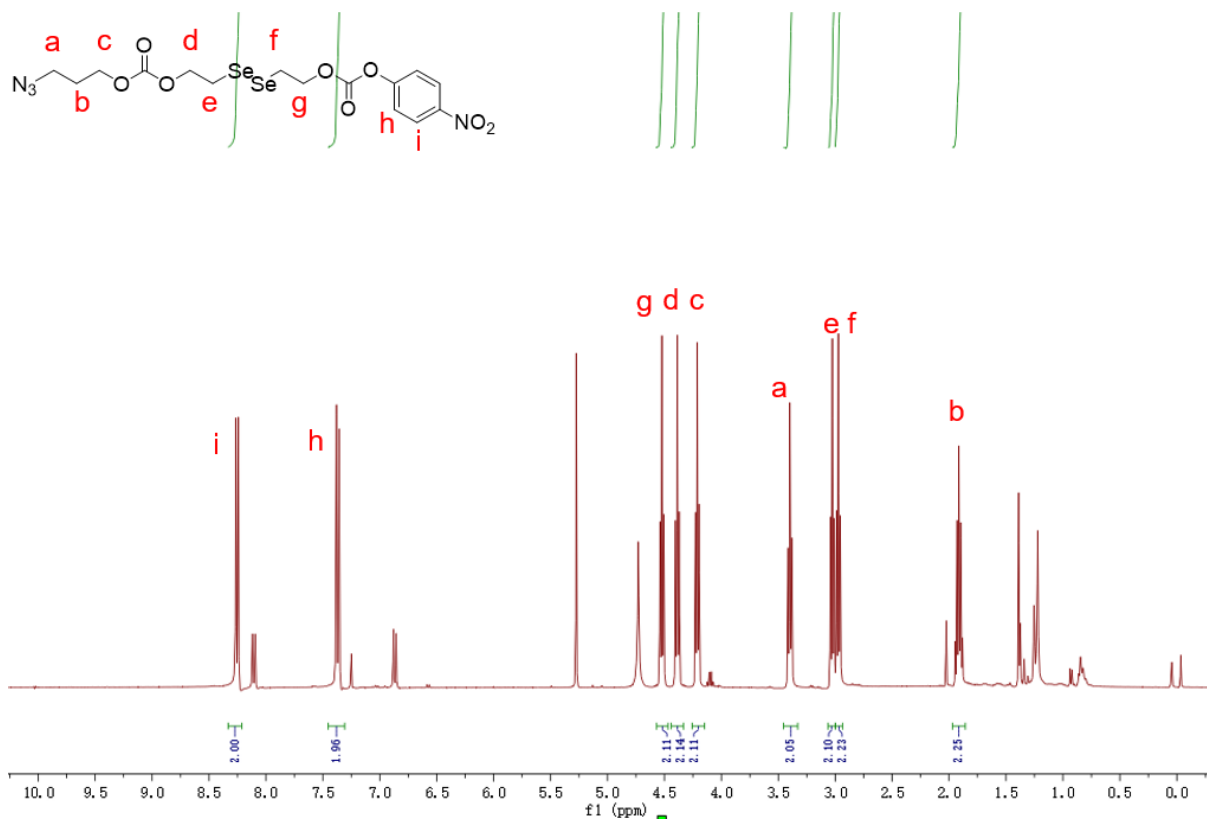

1  
2  
3

Figure S5. <sup>1</sup>H NMR of compound 10

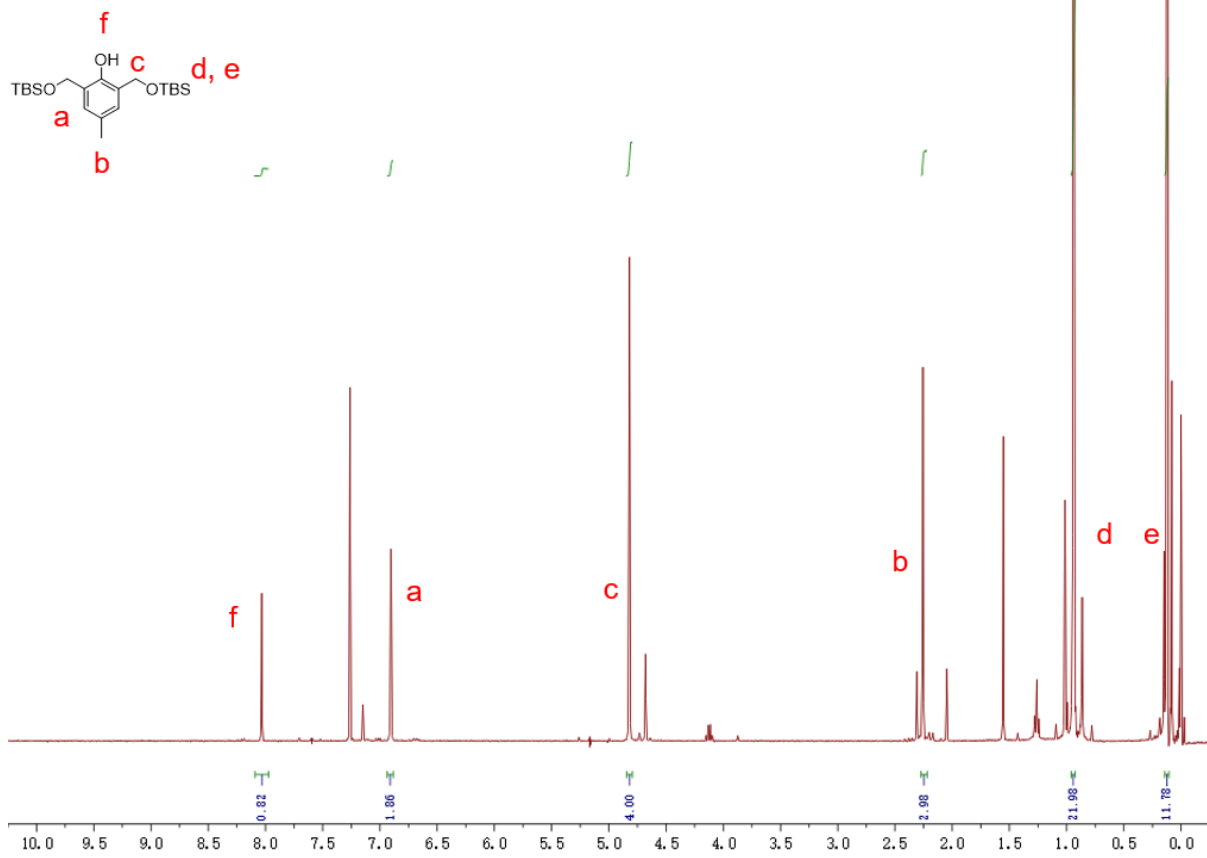

1

2

Figure S6. <sup>1</sup>H NMR of compound 12

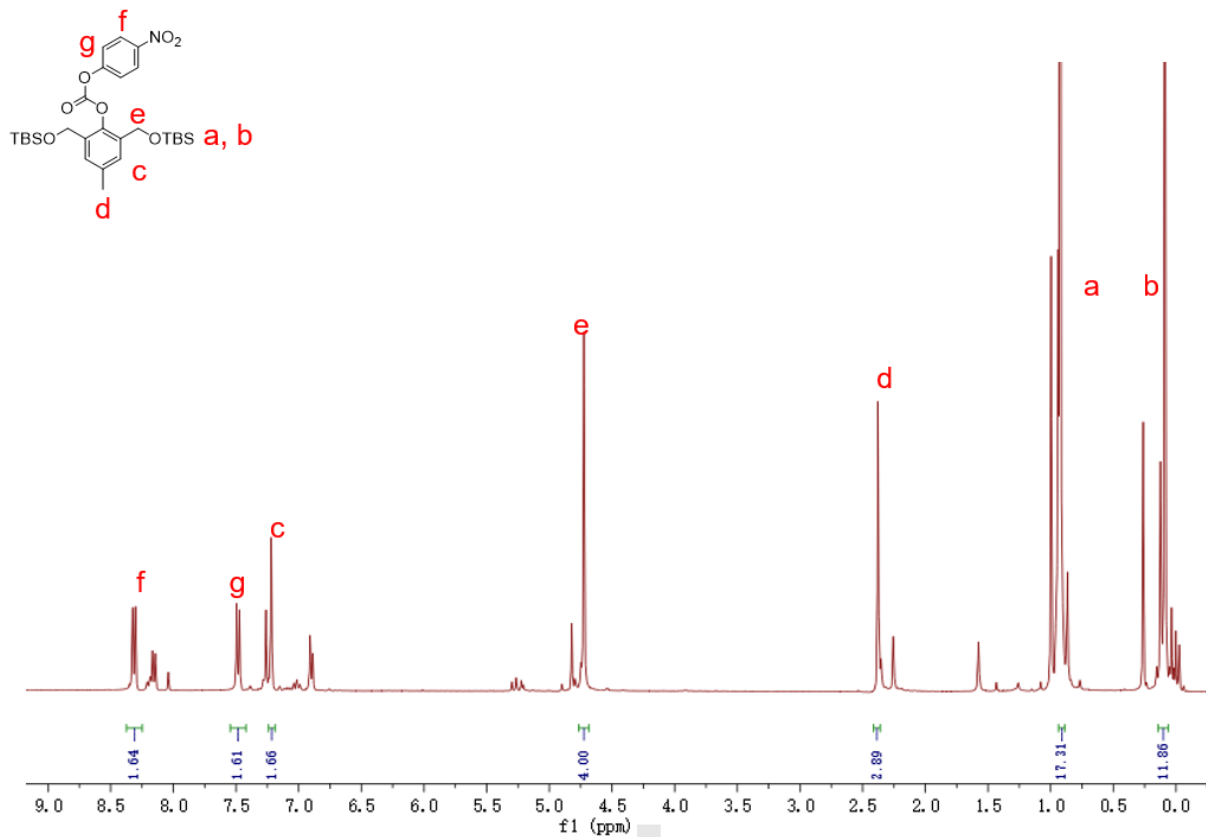

Figure S7. <sup>1</sup>H NMR of compound 13

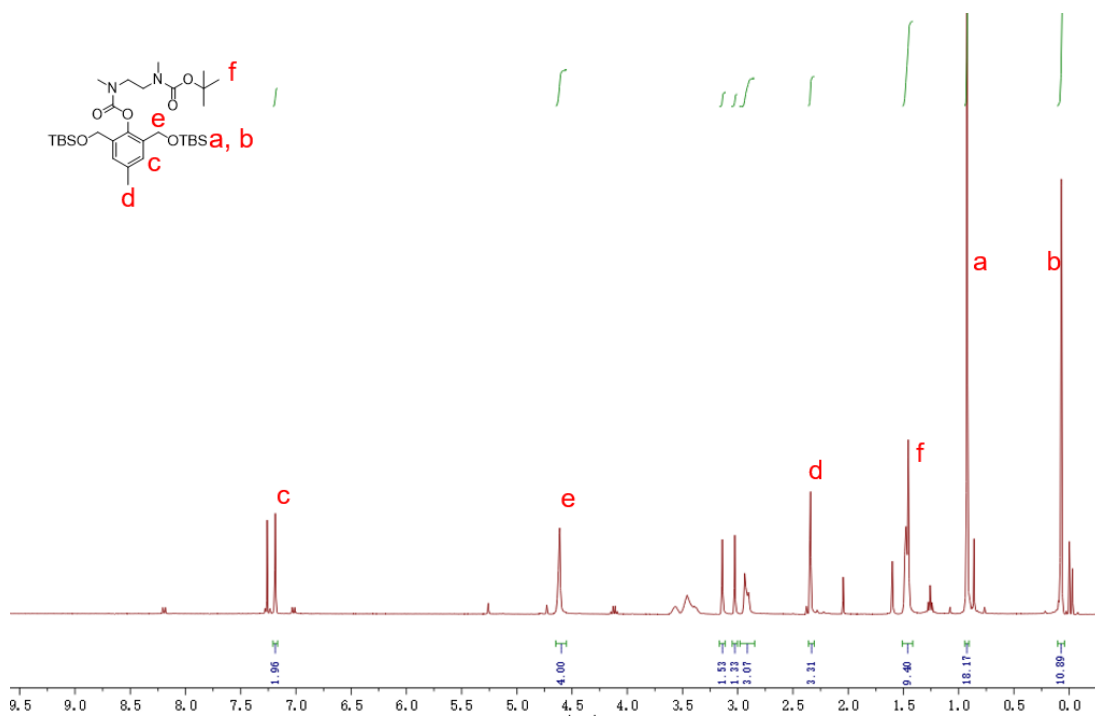

Figure S8. <sup>1</sup>H NMR of compound 14

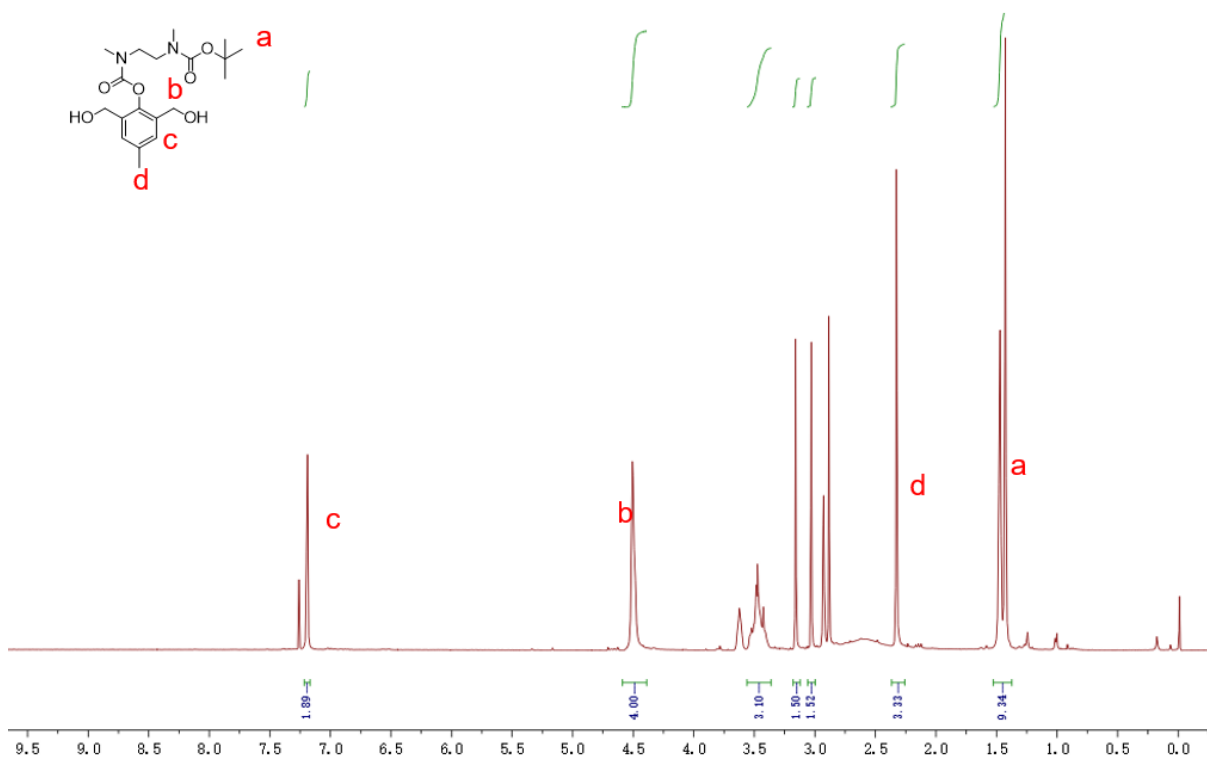

1  
2

Figure S9. <sup>1</sup>H NMR of compound 15

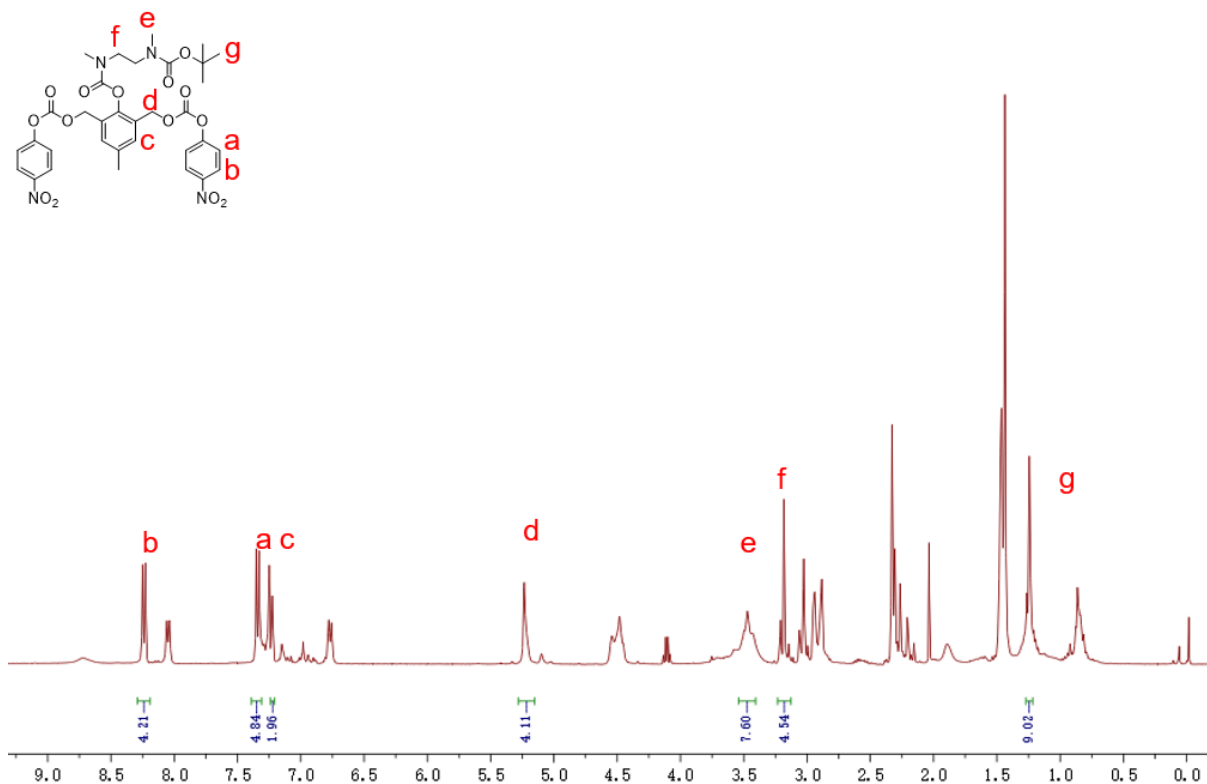

3  
4

Figure S10. <sup>1</sup>H NMR of compound 16



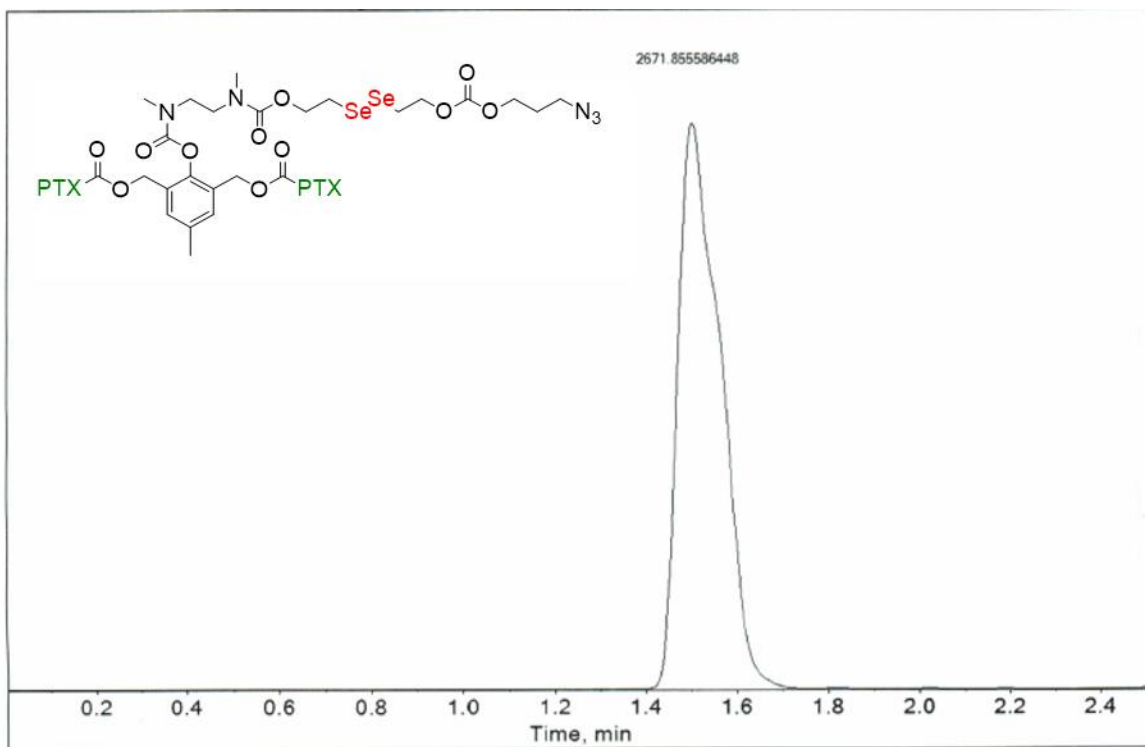

1  
2

Figure S11. Q-TOF of compound 19

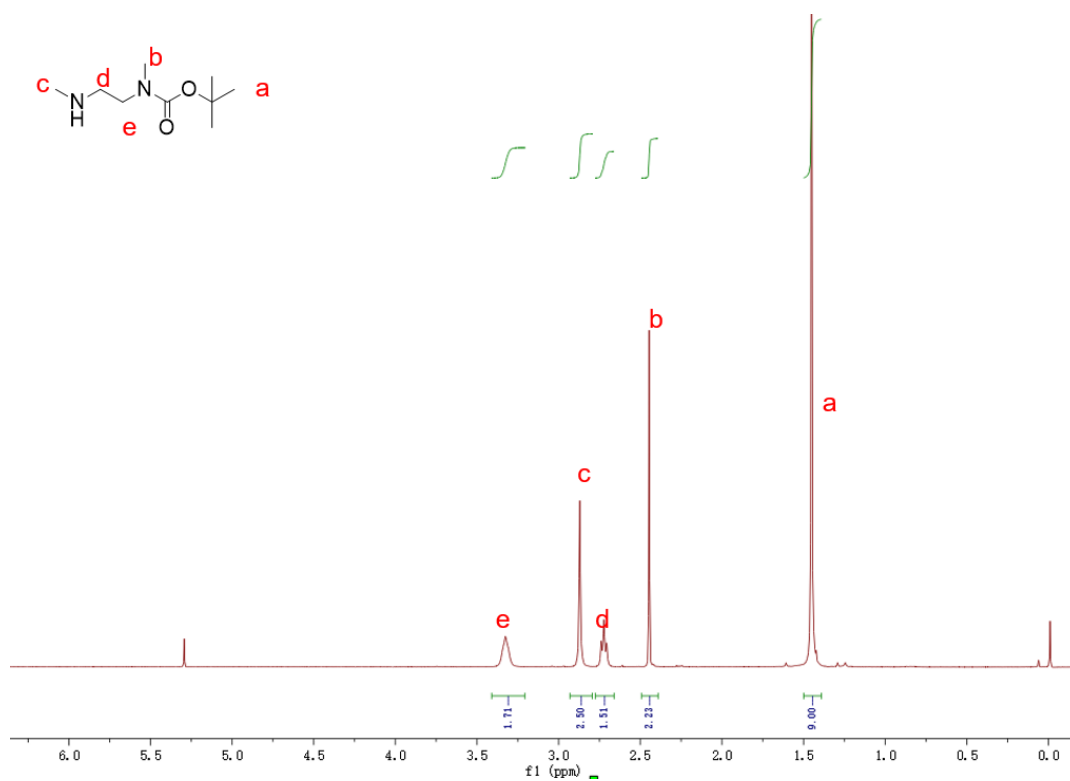

3  
4

Figure S12. <sup>1</sup>H NMR of compound 20

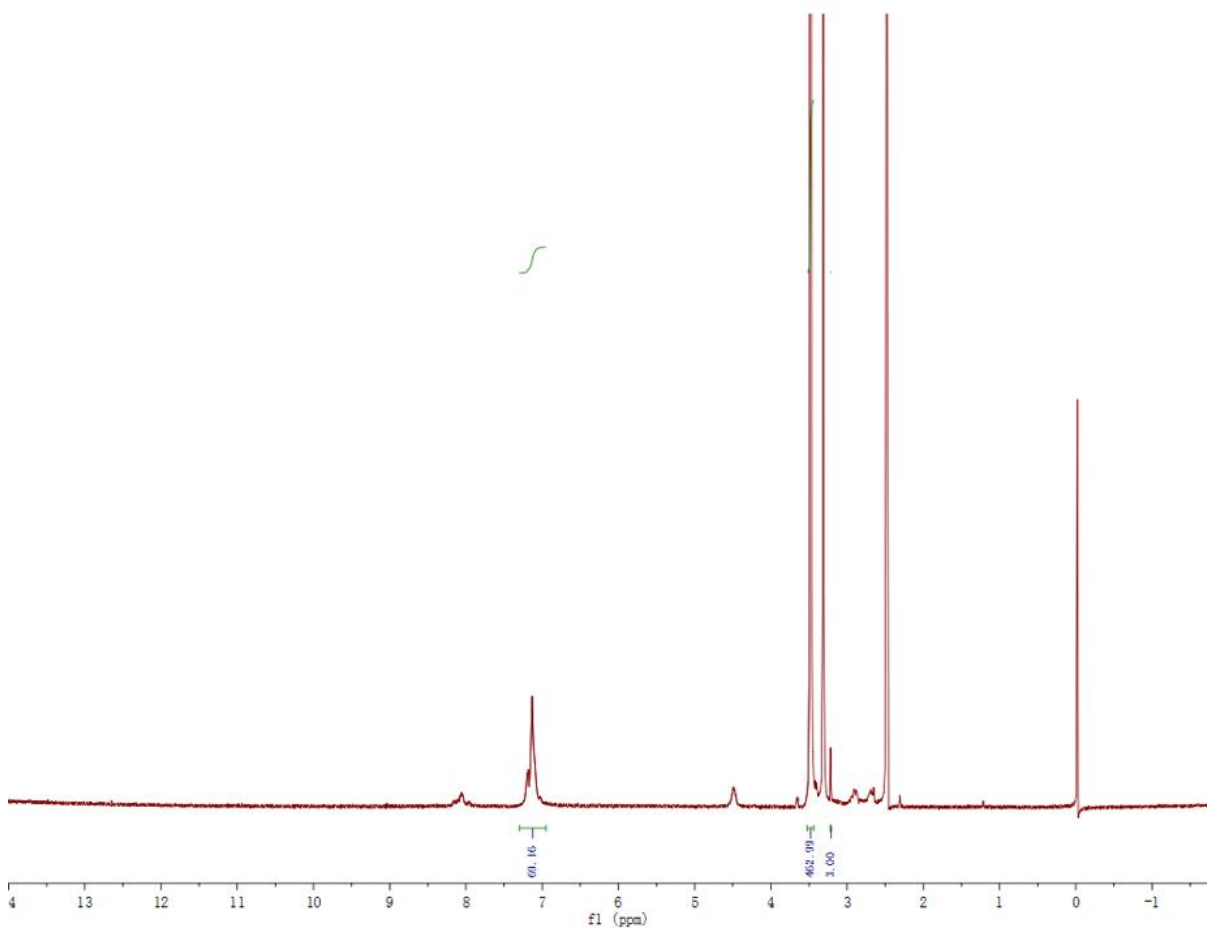

1

2

**Figure S13.** <sup>1</sup>H NMR of compound 21

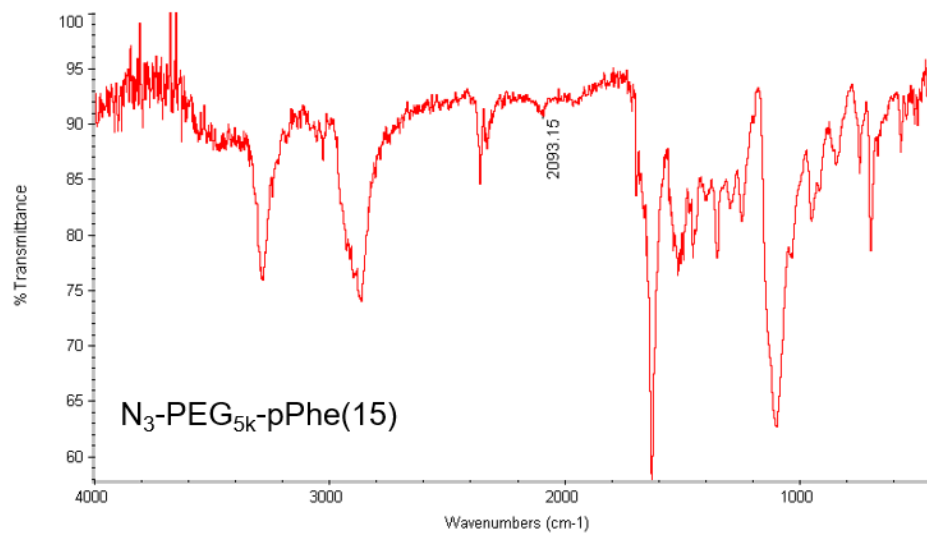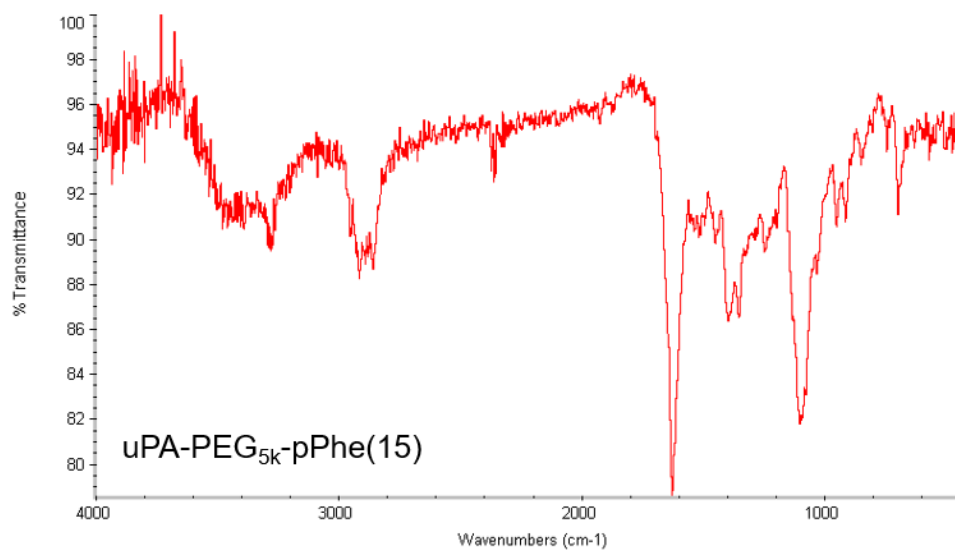

1  
2  
3  
4  
5  
6  
7  
8

**Figure S14.** IR spectrum of N<sub>3</sub>-PEG<sub>5k</sub>-pPhe(15) and uPA-PEG<sub>5k</sub>-pPhe(15)

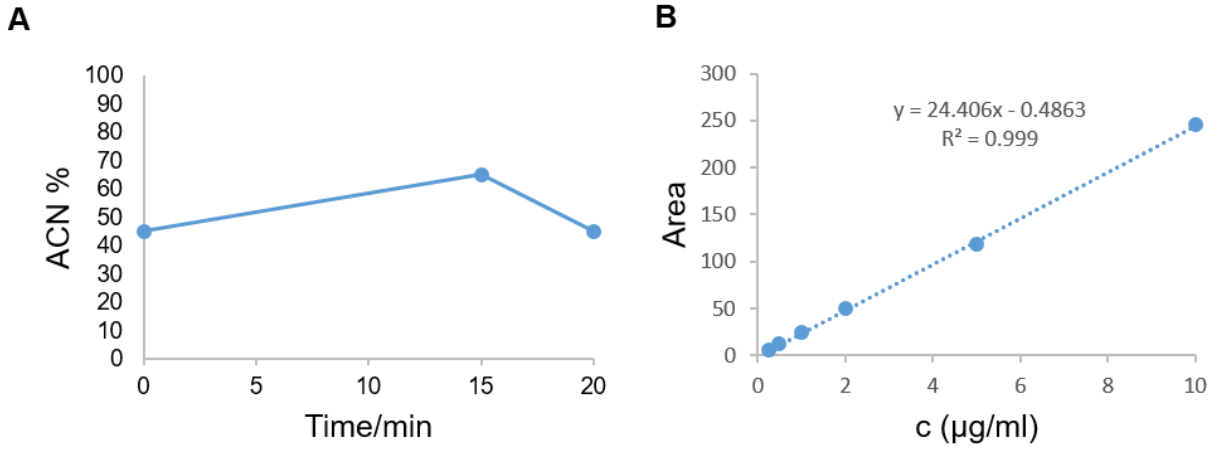

1  
2  
3  
4  
5  
6

**Figure S15.** (A) HPLC method for PTX analysis. (B) HPLC Standard curve of PTX based on UV (227 nm) ( $R^2=0.999$ )

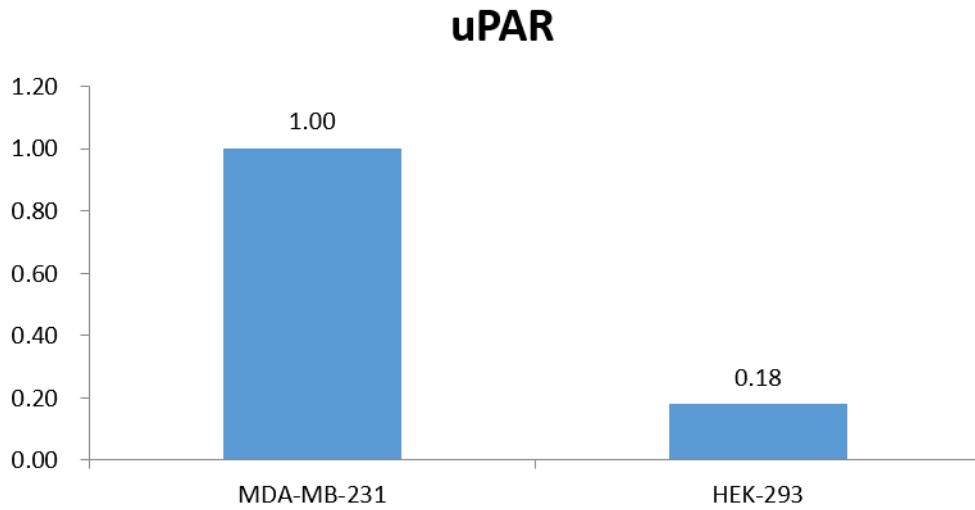

7  
8  
9  
10

**Figure S16.** RNA expression levels of uPAR were evaluated by real-time RT-PCR in TNBC MDA-MB-231 cells and non-carcinomas HEK-293 cells.

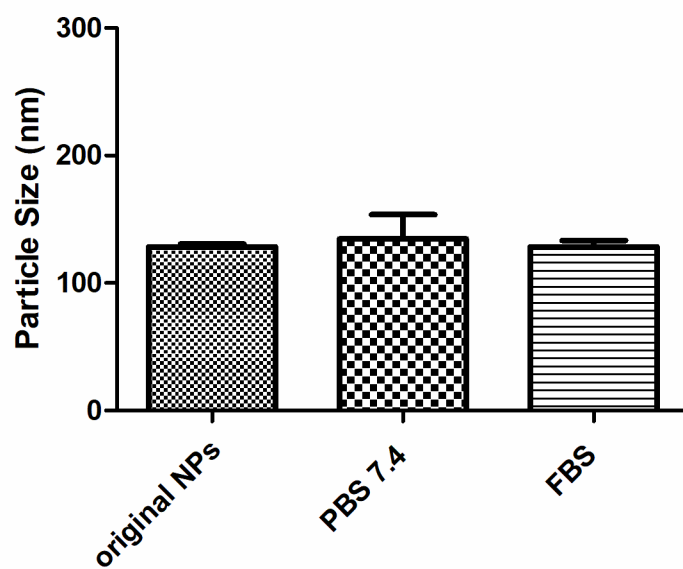

1  
2 **Figure S17.** Particle size change of uPA-PTXD NPs incubated with PBS 7.4 and FBS for 12 h.  
3

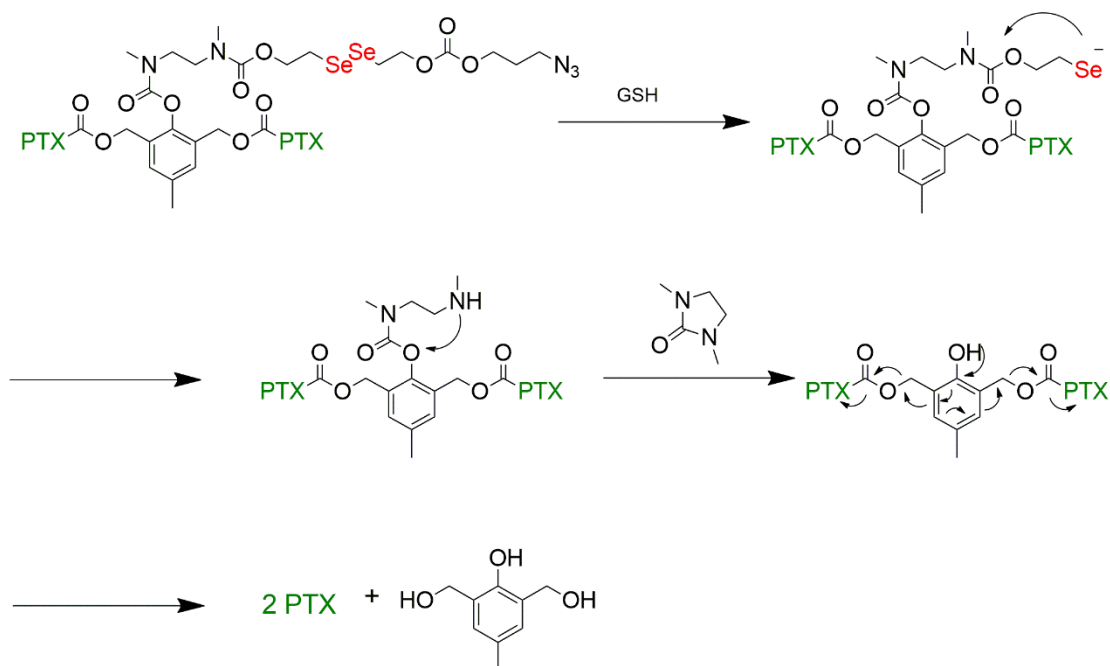

**Scheme S2.** Proposed release mechanism of GSH triggered drug release

| Entry | 600 rpm             | Day 0     |       | Day 7     |       |
|-------|---------------------|-----------|-------|-----------|-------|
|       | PTXD:PEG5k-pPhe(5)  | Size (nm) | PDI   | Size (nm) | PDI   |
| 1     | 8:1                 | 205.2     | 0.250 | 175.9     | 0.138 |
| 2     | 4:1                 | 167.0     | 0.129 | 179.3     | 0.135 |
| 3     | 2:1                 | 153.1     | 0.209 | 164.8     | 0.131 |
| 4     | 1:1                 | 166.7     | 0.182 | 175.0     | 0.170 |
| 5     | 1:2                 | -         | 0.441 | -         | 0.400 |
| 6     | 1:4                 | -         | 0.489 | -         | 0.569 |
|       | PTXD:PEG5k-pPhe(10) | Size (nm) | PDI   | Size (nm) | PDI   |
| 7     | 8:1                 | 162.5     | 0.144 | 171.9     | 0.192 |
| 8     | 4:1                 | 146.6     | 0.150 | 172.3     | 0.196 |
| 9     | 2:1                 | -         | 0.289 | -         | 0.314 |
| 10    | 1:1                 | -         | 0.376 | -         | 0.372 |
| 11    | 1:2                 | -         | 0.357 | -         | 0.611 |
| 12    | 1:4                 | -         | 0.291 | -         | 0.478 |
|       | PTXD:PEG5k-pPhe(15) | Size (nm) | PDI   | Size (nm) | PDI   |
| 13    | 8:1                 | 150.3     | 0.170 | 188.5     | 0.220 |
| 14    | 4:1                 | 135.0     | 0.110 | 152.5     | 0.177 |
| 15    | 2:1                 | 103.6     | 0.138 | 109.6     | 0.199 |
| 16    | 1:1                 | 112.7     | 0.199 | -         | 0.353 |
| 17    | 1:2                 | -         | 0.328 | -         | 0.326 |
| 18    | 1:4                 | -         | 0.334 | -         | 0.518 |
|       | PTXD:PEG5k-pPhe(20) | Size (nm) | PDI   | Size (nm) | PDI   |
| 19    | 8:1                 | 150.6     | 0.144 | 184.3     | 0.268 |
| 20    | 4:1                 | 147.1     | 0.200 | 167.0     | 0.207 |
| 21    | 2:1                 | 144.5     | 0.228 | -         | 0.341 |
| 22    | 1:1                 | -         | 0.374 | -         | 0.357 |
| 23    | 1:2                 | -         | 0.525 | -         | 0.479 |
| 24    | 1:4                 | -         | 0.487 | -         | 0.464 |

**Table S1.** Formulation of PTXD-Se with mPEG<sub>5k</sub>-pPhe(n) *via* Nanoprecipitation

1  
2  
3
